# Supplementary material for: Single Mo atoms paired with neighbouring Ti atoms catalytically decompose ammonium bisulfate formed in low-temperature SCR
Source: Royal Society of Chemistry journal article supplement (doi:10.1039/d1ta08269h), 2021-11-01
Supplement: d1ta08269h1.pdf [file d1ta08269h1.pdf]

## Supporting Information

### **Single Mo atoms paired with neighboring Ti atoms catalytically decompose ammonium bisulfate formed in low-temperature SCR**

Junxiao Chen,<sup>a</sup> Xue Fang,<sup>a</sup> Zhouhong Ren,<sup>b</sup> Weiye Qu,<sup>a</sup> Xiaolei Hu,<sup>a</sup> Zhen Ma,<sup>ac</sup> Liwei Chen,<sup>b</sup> Xi Liu,<sup>\*b</sup>  
Yaxin Chen,<sup>\*a</sup> and Xingfu Tang<sup>\*acd</sup>

<sup>a</sup>*Department of Environmental Science & Engineering, Fudan University, Shanghai, 200438, P. R. China. Email: tangxf@fudan.edu.cn; 16110740025@fudan.edu.cn.*

<sup>b</sup>*School of Chemistry and Chemical, In-situ Center for Physical Science, Shanghai Jiao Tong University, Shanghai, 200240, P. R. China. Email: liuxi@sjtu.edu.cn.*

<sup>c</sup>*Shanghai Institute of Pollution Control and Ecological Security, Shanghai, 200092, P. R. China.*

<sup>d</sup>*Jiangsu Collaborative Innovation Centre of Atmospheric Environment & Equipment Technology, Nanjing University of Information Science & Technology, Nanjing, 210044, P.R. China*

## Figures and Tables

**Table R1** Relevant parameters from TPDC experiments

| Samples                           | S / ppm | A / mL | yield / % |
|-----------------------------------|---------|--------|-----------|
| Mo <sub>1</sub> /TiO <sub>2</sub> | 1045    | 0.52   | 67        |
| VWTi                              | 936     | 0.47   | 60        |
| MoO <sub>3</sub>                  | 592     | 0.30   | 38        |
| TiO <sub>2</sub>                  | 390     | 0.20   | 25        |

The corresponding total concentration of SO<sub>2</sub> (denoted as S) was obtained from TPDC experiments. Multiplying S by the flow rate (500 mL min<sup>-1</sup>) can get the total release amount of SO<sub>2</sub> (denoted as A). Meanwhile, based on the loading of ABS (2%) and the mass of catalysts (0.2 g), the maximum release amount of SO<sub>2</sub> was calculated to be 0.78 mL, assuming that HSO<sub>4</sub><sup>-</sup> is completely decomposed into SO<sub>2</sub>. The corresponding yield of the produced SO<sub>2</sub> can be obtained by dividing A by 0.78 mL. The yields are 67%, 60%, 38% and 25% for Mo<sub>1</sub>/TiO<sub>2</sub>, VWTi, MoO<sub>3</sub> and TiO<sub>2</sub>, respectively.

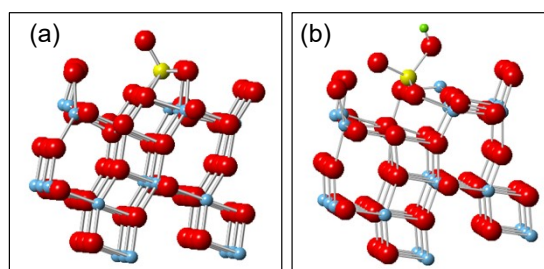

**Fig. S1** Side view of structure model of Mo adatom on TiO<sub>2</sub> (101) plane from DFT calculation (a) together with that after removing an oxygen atom in MoO<sub>5</sub> motif (b). Light blue represents Ti atoms, red O atoms, green H atoms, and yellow Mo atoms.

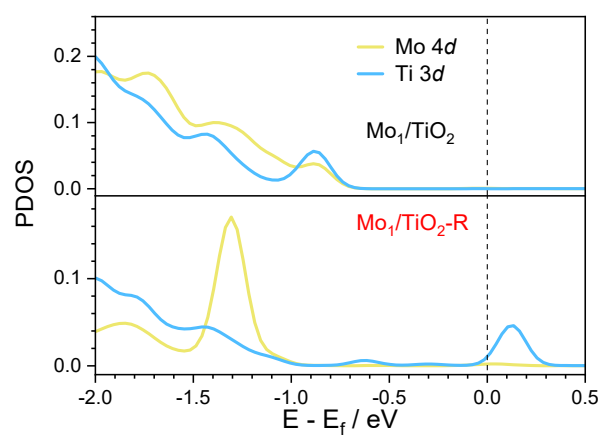

**Fig. S2** PDOS of Mo site (4d) and Ti site (3d) in Mo<sub>1</sub>/TiO<sub>2</sub> (up) and Mo<sub>1</sub>/TiO<sub>2</sub>-R (down).

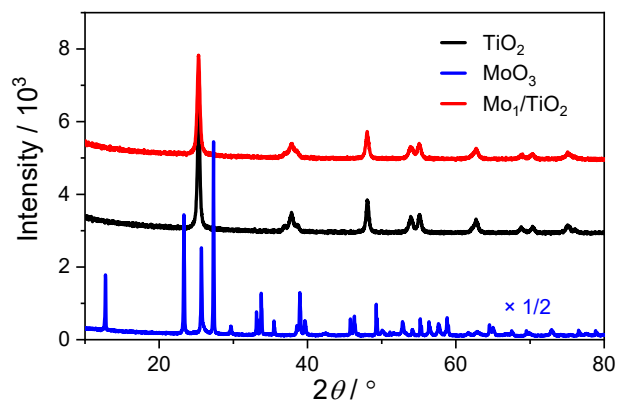

**Fig. S3** XRD patterns of  $\text{Mo}_1/\text{TiO}_2$ ,  $\text{MoO}_3$  and  $\text{TiO}_2$  catalysts. No peaks corresponding to  $\text{MoO}_3$  appear on the XRD pattern of  $\text{Mo}_1/\text{TiO}_2$ , indicating a highly-dispersed state of Mo species on  $\text{TiO}_2$ .

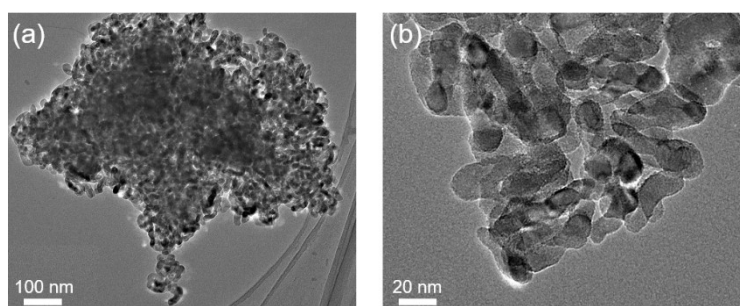

**Fig. S4** (a,b) TEM images of  $\text{Mo}_1/\text{TiO}_2$ . No  $\text{MoO}_3$  particles can be observed in the images of  $\text{Mo}_1/\text{TiO}_2$ .

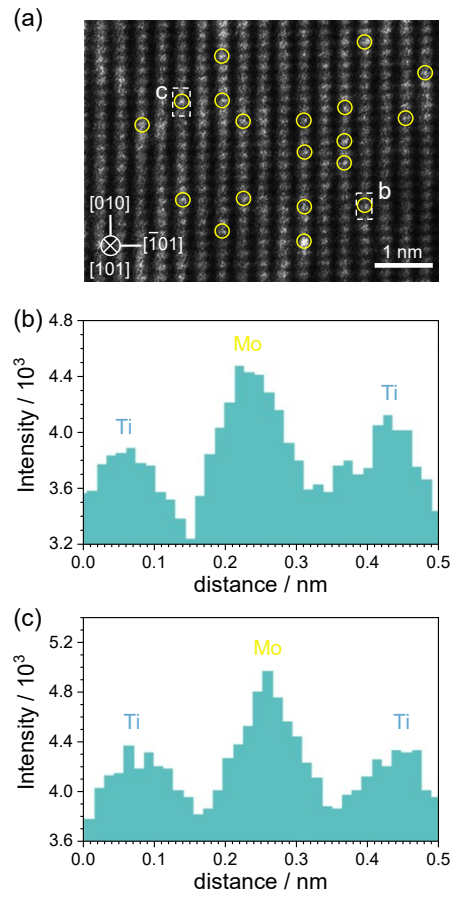

**Fig. S5** (a) Atomic-resolution AC-STEM image of Mo<sub>1</sub>/TiO<sub>2</sub>. (b) and (c) Normalized image intensities in sites b and c shown in (a), respectively.

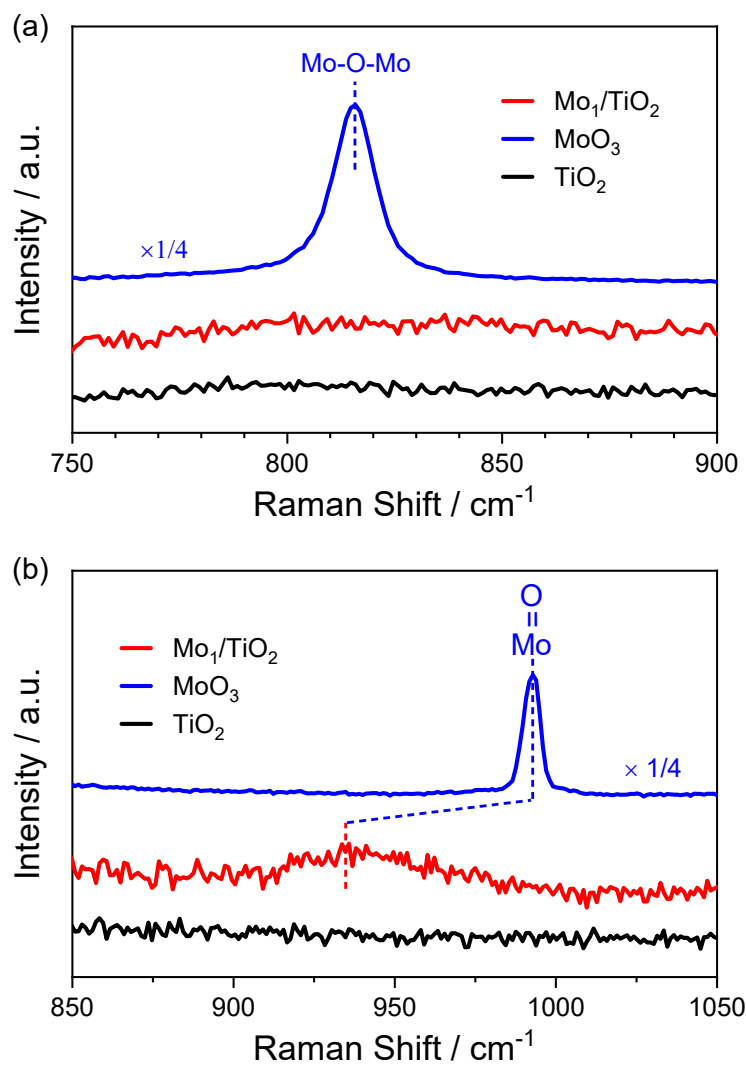

Fig. S6 (a, b) Raman spectra of Mo<sub>1</sub>/TiO<sub>2</sub>, MoO<sub>3</sub>, and TiO<sub>2</sub> catalysts.

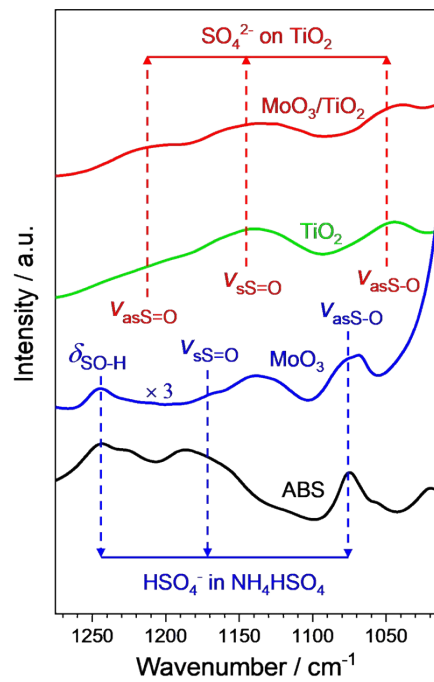

**Fig. S7** FT-IR spectra of ABS-deposited catalysts together with pure ABS. The characteristic peaks on the spectra of ABS-MoO<sub>3</sub> and pure ABS are nearly the same.

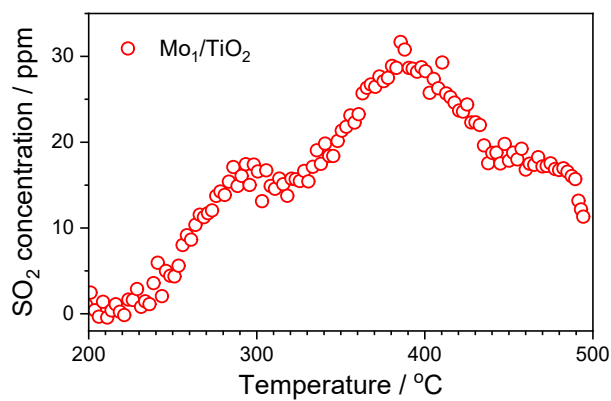

**Fig. S8** SO<sub>2</sub> signal of pre-reduced Mo<sub>1</sub>/TiO<sub>2</sub> with 2% ABS deposited during TPDC experiment.

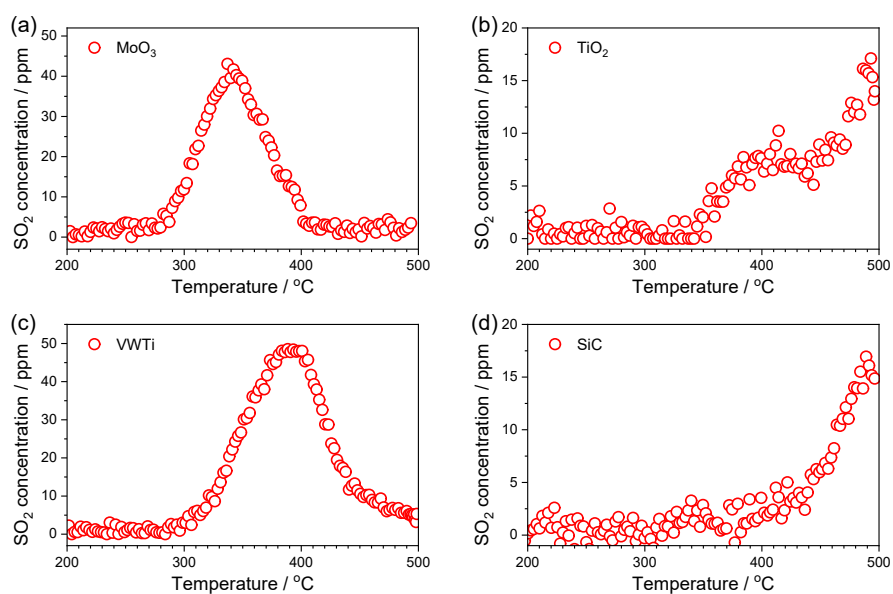

**Fig. S9** SO<sub>2</sub> signal of (a) pre-reduced MoO<sub>3</sub>, (b) pre-reduced TiO<sub>2</sub>, (c) V<sub>2</sub>O<sub>5</sub>-WO<sub>3</sub>/TiO<sub>2</sub> (VWTi) and (d) SiC with 2% ABS deposited as referenced samples during TPDC experiment. SiC processes nearly no redox property, so it was chosen to depict the pristine SO<sub>2</sub> release temperature of ABS.



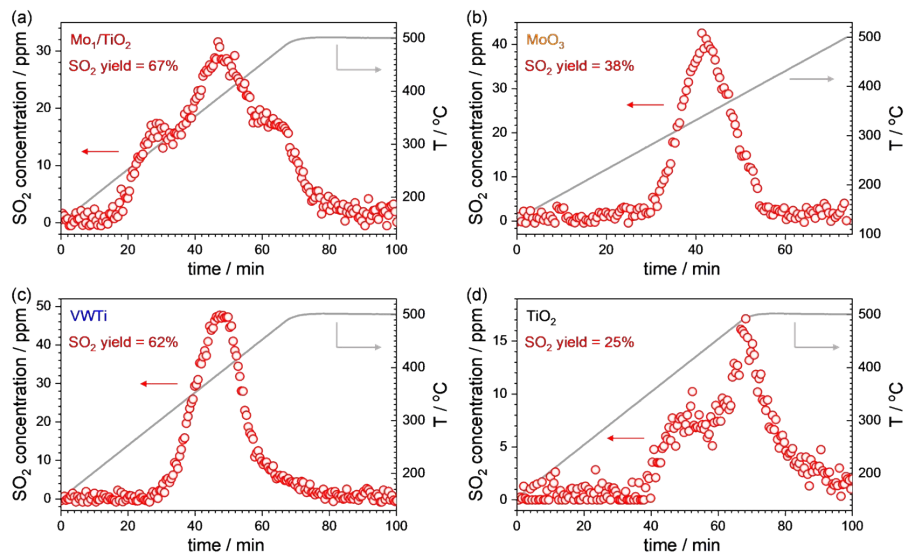

**Fig. S10** SO<sub>2</sub> signal as a function of time over ABS-deposited Mo<sub>1</sub>/TiO<sub>2</sub> (a), MoO<sub>3</sub> (b), VWTi (c) and TiO<sub>2</sub> (d) during TPDC experiments.

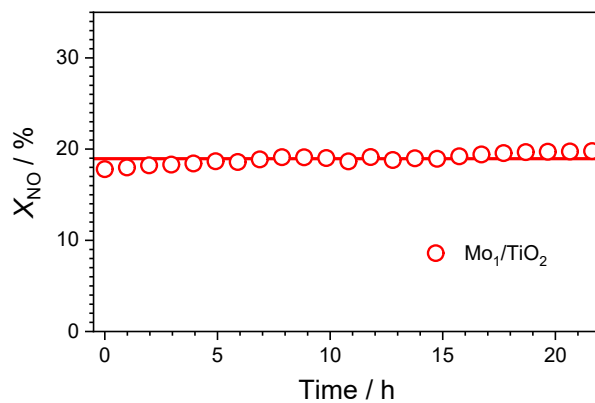

**Fig. S11** NO conversion as a function of time over Mo<sub>1</sub>/TiO<sub>2</sub> catalyst. Conditions: 0.50 g catalyst, T = 260 °C, 500 ppm NH<sub>3</sub> = NO, 500 ppm SO<sub>2</sub>, 5 vol.% H<sub>2</sub>O, 3 vol.% O<sub>2</sub>, N<sub>2</sub> balanced. The catalyst was per-treated for 10 hours to exclude the effect of surface acidification on the activity.

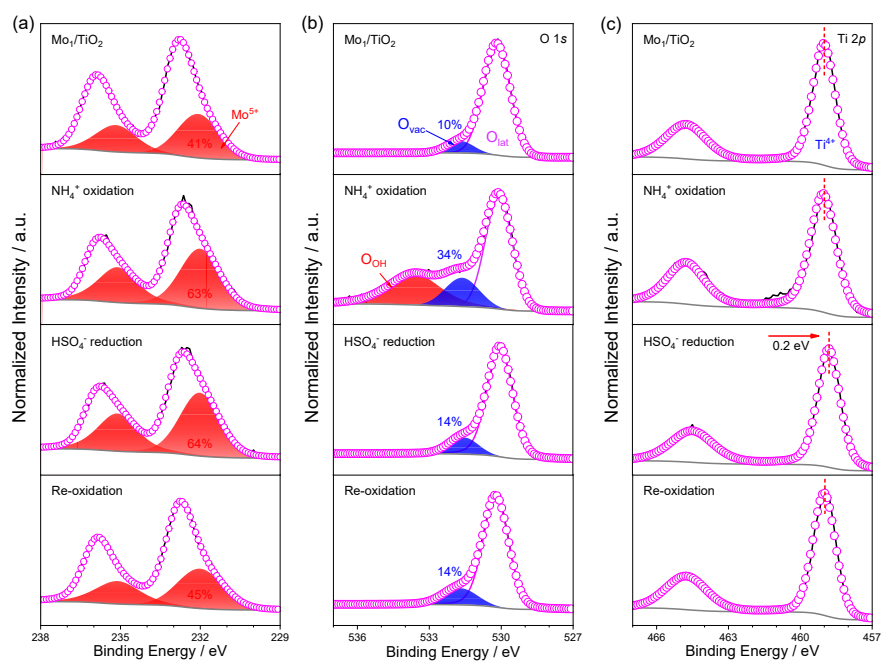

**Fig. S12** (a) Mo 3d, (b) O 1s and (c) Ti 2p XPS of Mo<sub>1</sub>/TiO<sub>2</sub> catalyst during different stages. On the process of NH<sub>4</sub><sup>+</sup> oxidation, Mo gains electrons and oxygen vacancies increase along with the formation of high-energy H<sub>2</sub>O molecular. On the process of HSO<sub>4</sub><sup>-</sup> reduction, electron was transferred from O to Ti and S, resulting in decrease of O vacancies and the release of SO<sub>2</sub>. After re-oxidation process, electronic states of all elements go back to the pristine levels.

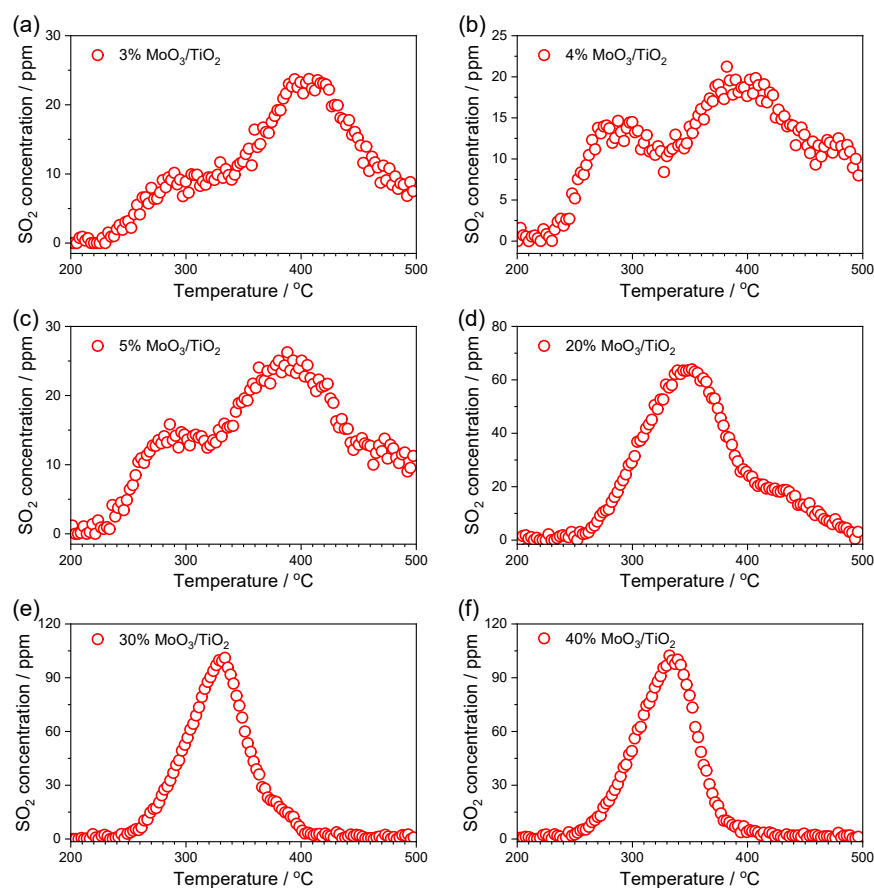

**Fig. S13** SO<sub>2</sub> signal of a series of ABS-deposited pre-reduced MoO<sub>3</sub>/TiO<sub>2</sub> catalysts with different MoO<sub>3</sub> loading during TPDC experiment.

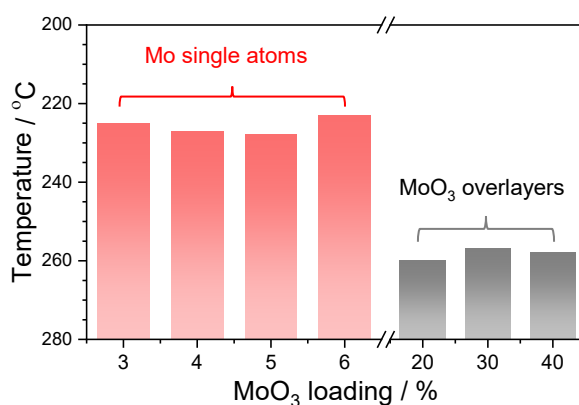

**Fig. S14** Onset temperature of the SO<sub>2</sub> release curves over ABS-deposited pre-reduced MoO<sub>3</sub>/TiO<sub>2</sub> catalysts as a function of MoO<sub>3</sub> loading. Mo<sub>1</sub>/TiO<sub>2</sub> corresponds to sample with 6 wt.% MoO<sub>3</sub> loading. At low loadings (Mo-Ti dual sites on surface), the SO<sub>2</sub> release temperatures are almost the same, which are located at ~225 °C, while at high loading (only MoO<sub>3</sub> on surface), the temperature all delay to ~260 °C.

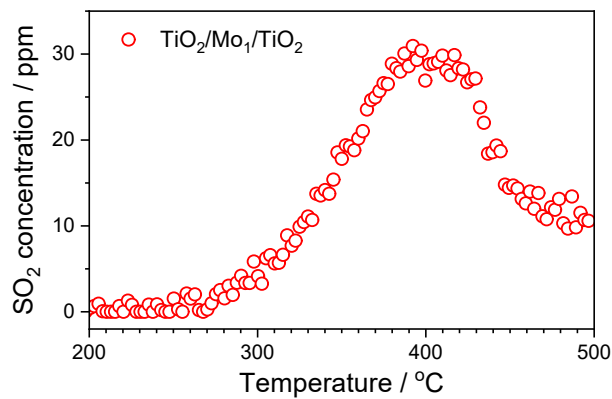

**Fig. S15** SO<sub>2</sub> signal of pre-reduced TiO<sub>2</sub>/Mo<sub>1</sub>/TiO<sub>2</sub> with 2% ABS deposited during TPDC experiment.

After the coverage of TiO<sub>2</sub> on Mo single atoms, the onset of SO<sub>2</sub> release delays a lot.

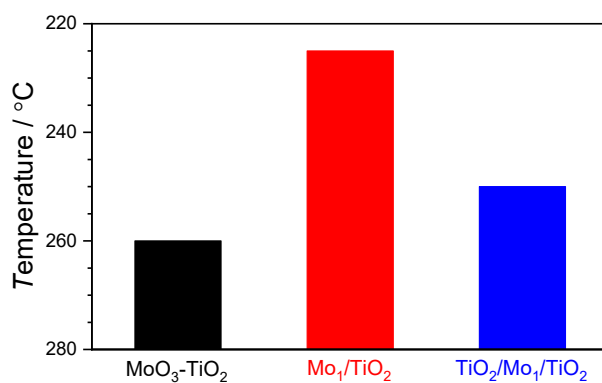

**Fig. S16** Onset temperature of the SO<sub>2</sub> release curves over ABS-deposited pre-reduced MoO<sub>3</sub>/TiO<sub>2</sub> (40 wt.% MoO<sub>3</sub> loading), Mo<sub>1</sub>/TiO<sub>2</sub>, and TiO<sub>2</sub>/Mo<sub>1</sub>/TiO<sub>2</sub> catalysts. When MoO<sub>3</sub> or TiO<sub>2</sub> mainly exposed on the surface, the onset of the SO<sub>2</sub> release delays a lot compared with that of MoO<sub>3</sub>/TiO<sub>2</sub>.
